# Supplementary material for: Alterations of a CaCl2 Alginate Composite for Thermochemical Heat Storage during the Hydration in a 1 L Packed Bed Laboratory Reactor
Source: MDPI journal article supplement (doi:10.3390/thermo3040035), 2023-10-10
Supplement: s1 [file s1]

# Alterations of a $\text{CaCl}_2$ alginate composites for thermochemical heat storage, during the hydration in a 1 L packed bed laboratory reactor

Stephan Heitmann <sup>1,\*</sup>, Tamás Simon <sup>2</sup>, Andrea Osburg <sup>1</sup> and Michael Fröba <sup>2</sup>

<sup>1</sup> F. A. Finger-Institute for Building Material Engineering, Chair of Construction Chemistry and Polymer Materials, Bauhaus-Universität Weimar, Coudraystraße 11A, 99423 Weimar, Germany

<sup>2</sup> Department of Chemistry, Institute of Inorganic and Applied Chemistry, University of Hamburg, Martin-Luther-King-Platz 6, 20146 Hamburg, Germany

\* Correspondence: stephan.lukas.heitmann@uni-weimar.de

## Contents

|                                                                                                              |   |
|--------------------------------------------------------------------------------------------------------------|---|
| Calcium chloride alginate composite – raw material – calorimetric and thermo gravimetric measurement. ....   | 2 |
| Reaction calorimetry with 20 % relative humidity in nitrogen .....                                           | 2 |
| Thermogravimetric examination of the calorimetric sample .....                                               | 2 |
| Reaction calorimetry with 30 % relative humidity in nitrogen .....                                           | 3 |
| Thermogravimetric examination of the calorimetric sample .....                                               | 3 |
| Calcium chloride alginate composite – five cycles – calorimetric and thermo gravimetric measurement. ....    | 4 |
| Reaction calorimetry with 20 % relative humidity in nitrogen .....                                           | 4 |
| Thermogravimetric examination of the calorimetric sample .....                                               | 4 |
| Reaction calorimetry with 30 % relative humidity in nitrogen .....                                           | 5 |
| Thermogravimetric examination of the calorimetric sample .....                                               | 5 |
| Calcium chloride alginate composite – ten cycles – calorimetric and thermo gravimetric measurement. ....     | 6 |
| Reaction calorimetry with 20 % relative humidity in nitrogen .....                                           | 6 |
| Thermogravimetric examination of the calorimetric sample .....                                               | 6 |
| Reaction calorimetry with 30 % relative humidity in nitrogen .....                                           | 7 |
| Thermogravimetric examination of the calorimetric sample .....                                               | 7 |
| Calcium chloride alginate composite – fifteen cycles – calorimetric and thermo gravimetric measurement. .... | 8 |
| Reaction calorimetry with 20 % relative humidity in nitrogen .....                                           | 8 |
| Thermogravimetric examination of the calorimetric sample .....                                               | 8 |
| Reaction calorimetry with 30 % relative humidity in nitrogen .....                                           | 9 |
| Thermogravimetric examination of the calorimetric sample .....                                               | 9 |

# Calcium chloride alginate composite – raw material – calorimetric and thermo gravimetric measurement.

Reaction calorimetry with 20 % relative humidity in nitrogen

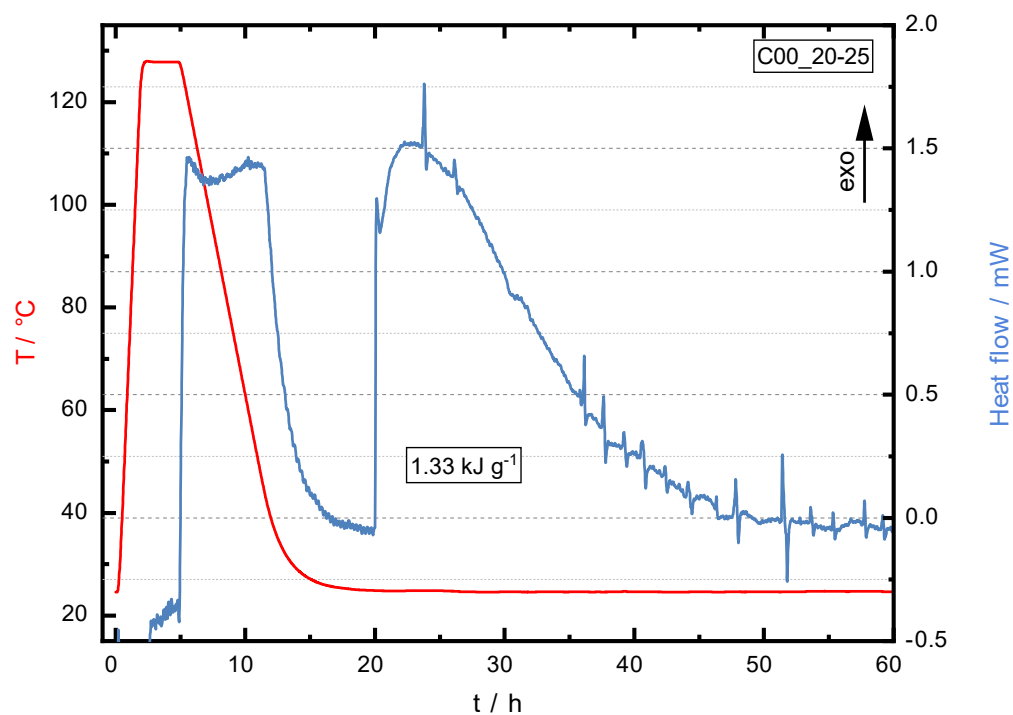

**Figure S1.** Heat of reaction measured by isothermal calorimetry at 20 % RH.

Thermogravimetric examination of the calorimetric sample

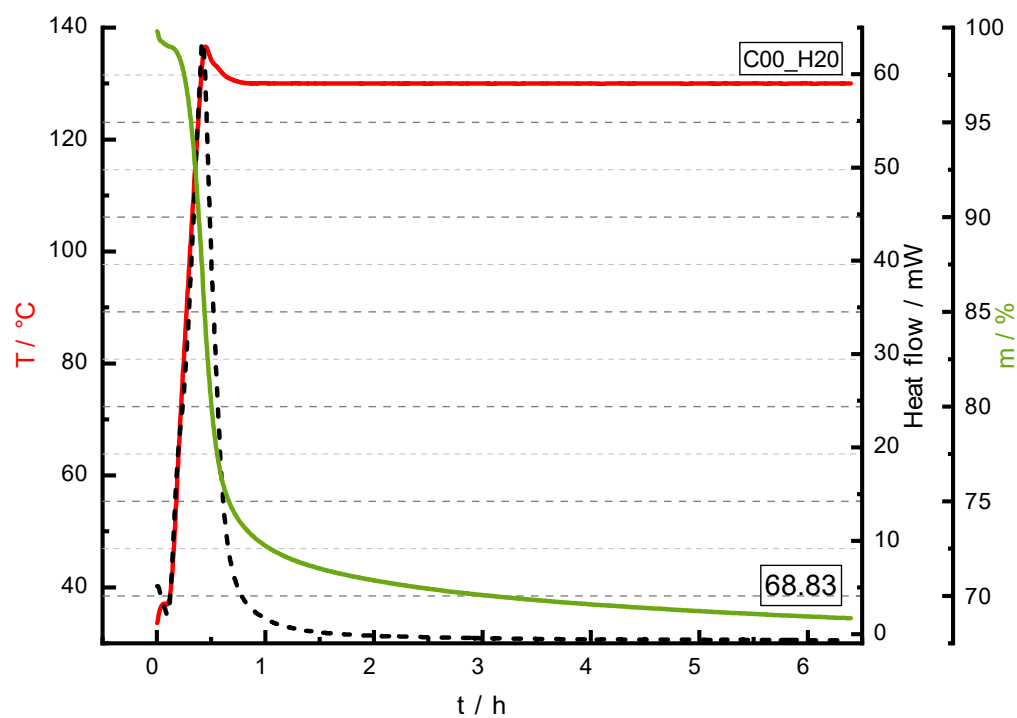

**Figure S2.** Mass loss during dehydration at 130 °C.

Reaction calorimetry with 30 % relative humidity in nitrogen

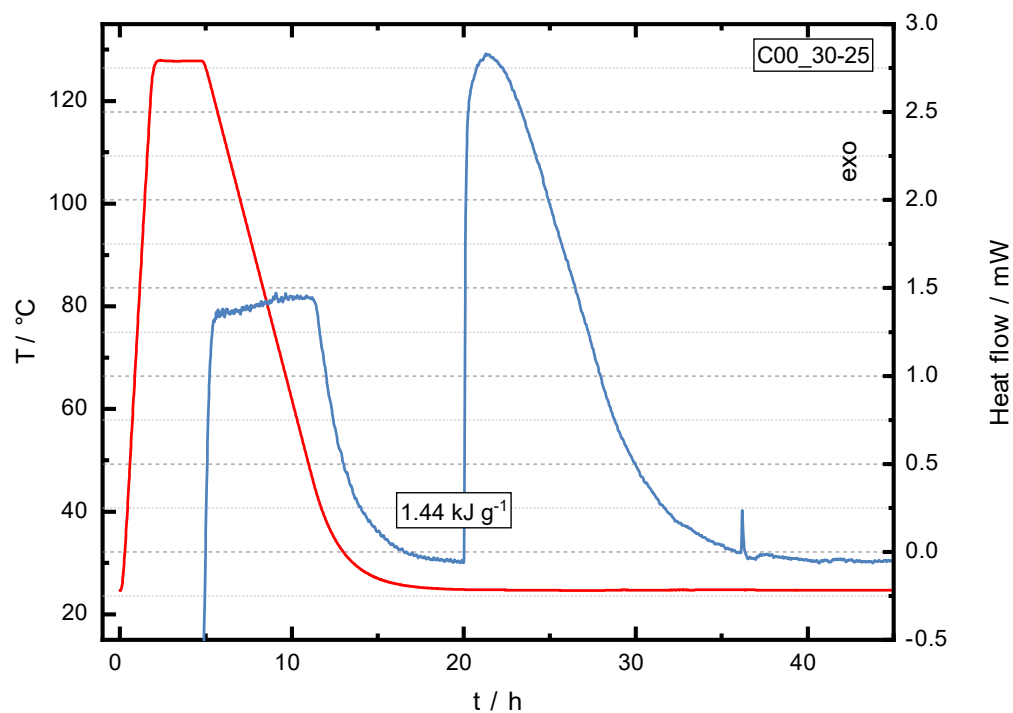

Figure S3. Heat of reaction measured by isothermal calorimetry at 30 % RH.

Thermogravimetric examination of the calorimetric sample

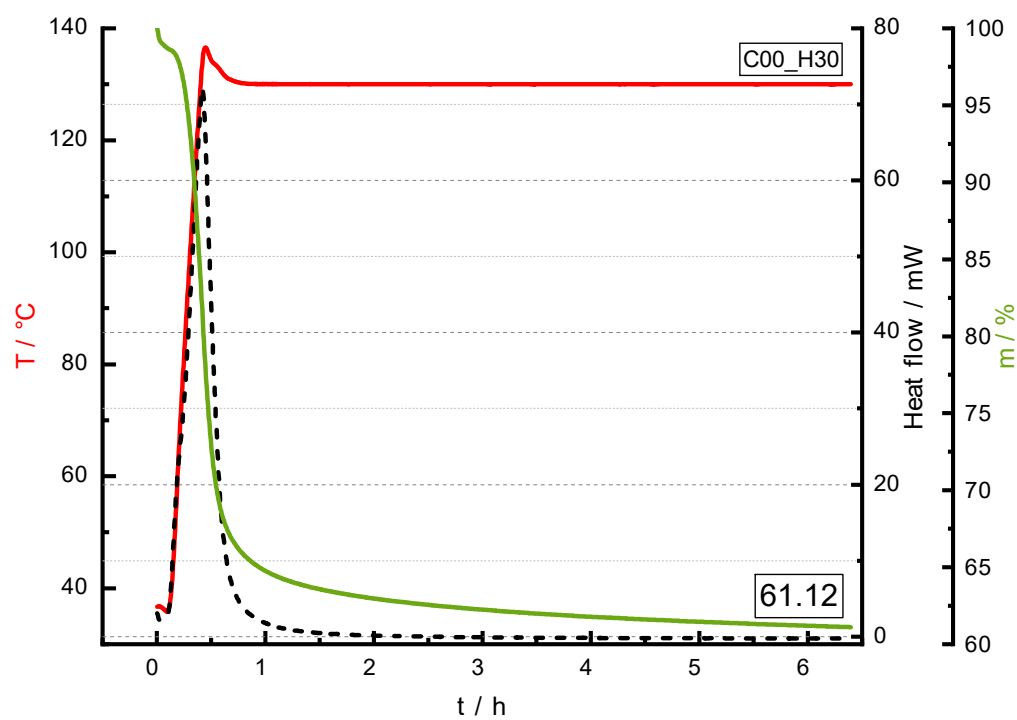

Figure S4. Mass loss during dehydration at 130 °C.

# Calcium chloride alginate composite – five cycles – calorimetric and thermo gravimetric measurement.

Reaction calorimetry with 20 % relative humidity in nitrogen

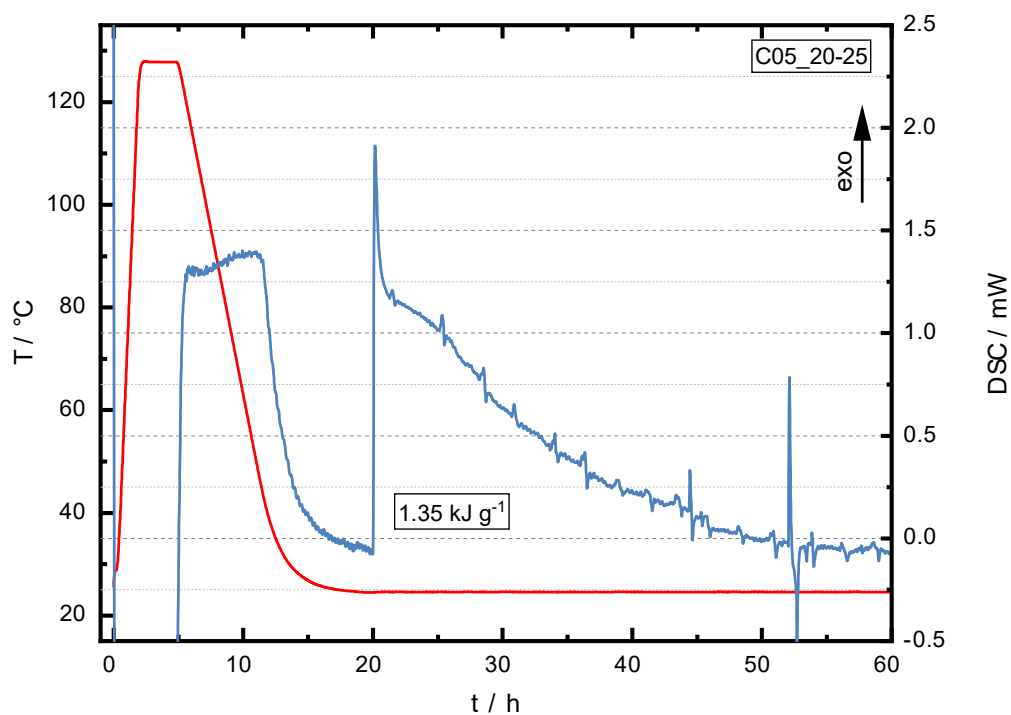

Figure S5. Heat of reaction measured by isothermal calorimetry at 20 % RH.

Thermogravimetric examination of the calorimetric sample

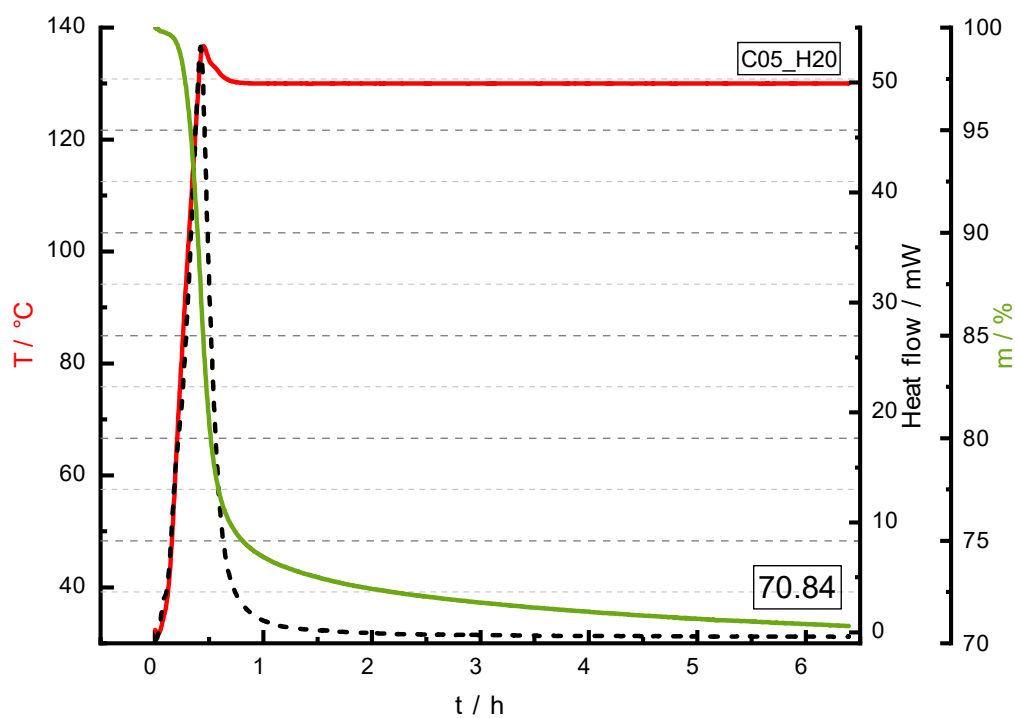

Figure S6. Mass loss during dehydration at 130 °C.

Reaction calorimetry with 30 % relative humidity in nitrogen

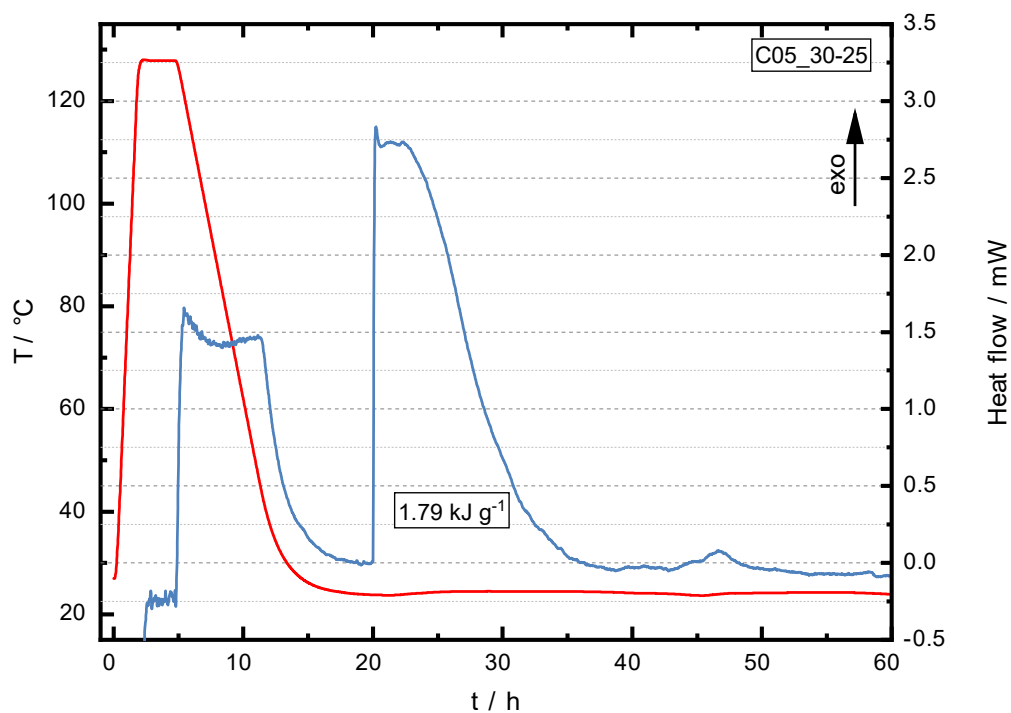

Figure S7. Heat of reaction measured by isothermal calorimetry at 30 % RH.

Thermogravimetric examination of the calorimetric sample

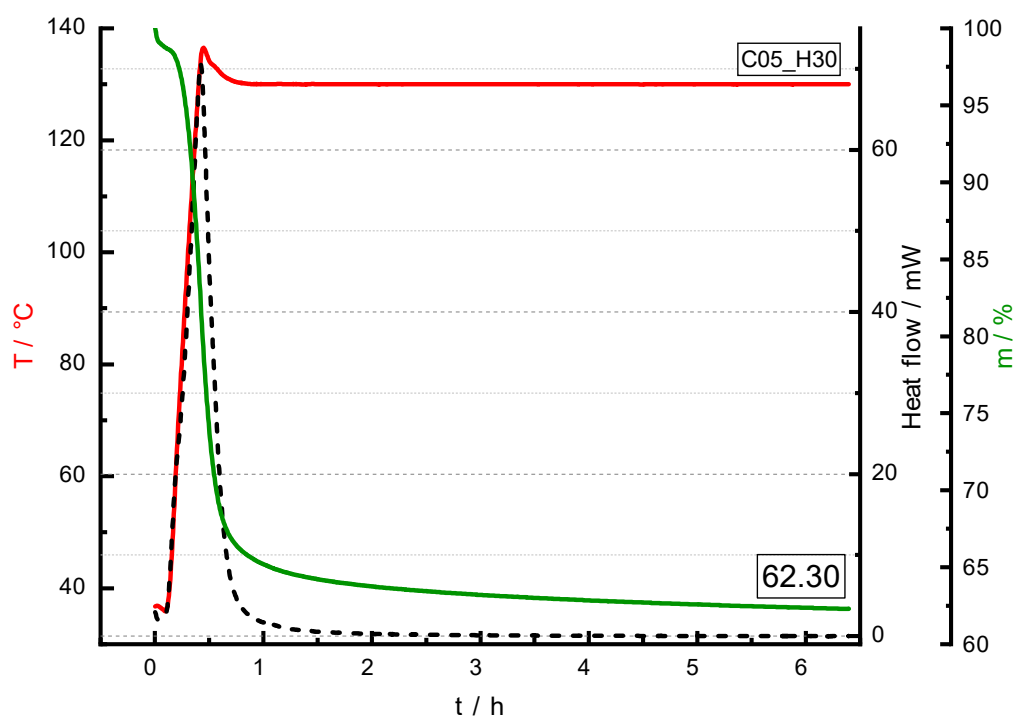

Figure S8. Mass loss during dehydration at 130  $^{\circ}\text{C}$ .

# Calcium chloride alginate composite – ten cycles – calorimetric and thermo gravimetric measurement.

Reaction calorimetry with 20 % relative humidity in nitrogen

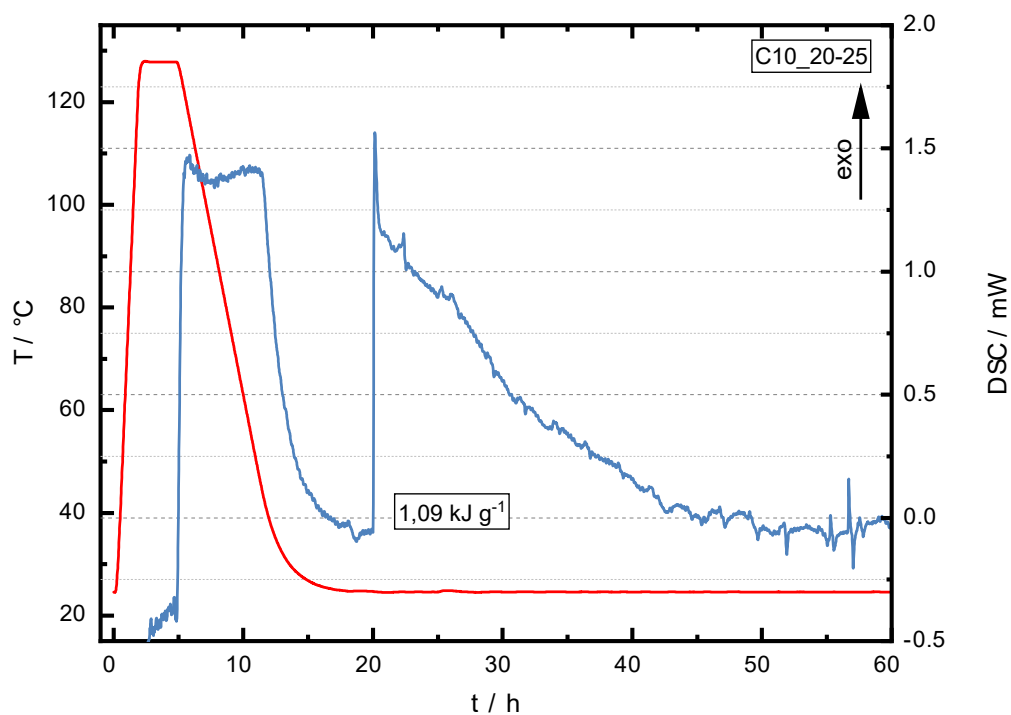

Figure S9. Heat of reaction measured by isothermal calorimetry at 20 % RH.

Thermogravimetric examination of the calorimetric sample

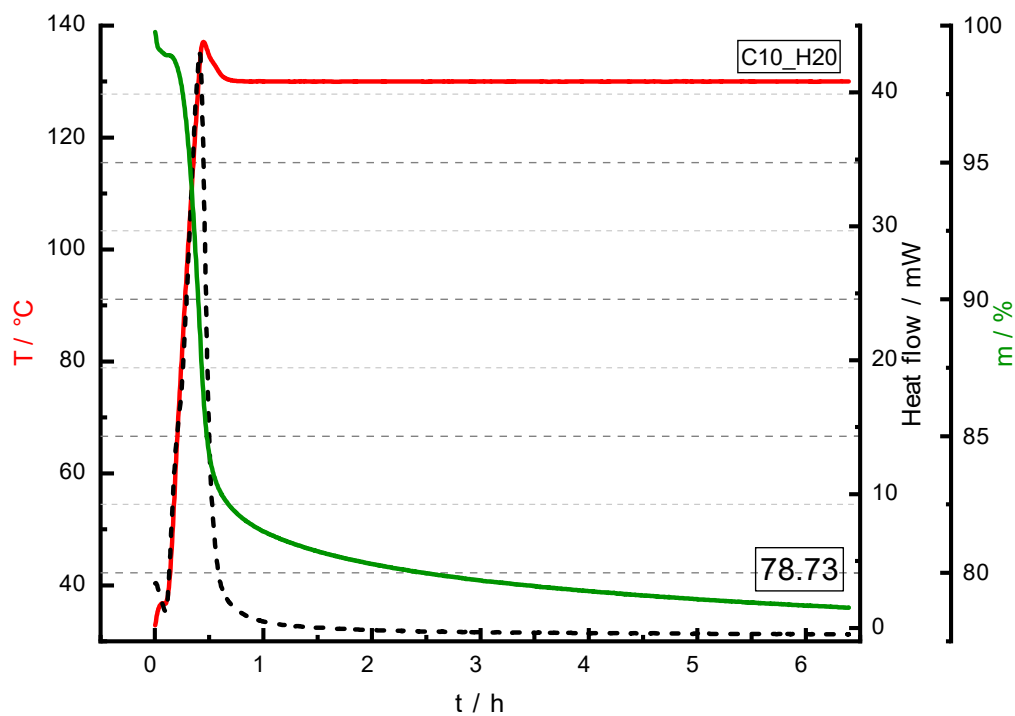

Figure S10. Mass loss during dehydration at 130 °C.

Reaction calorimetry with 30 % relative humidity in nitrogen

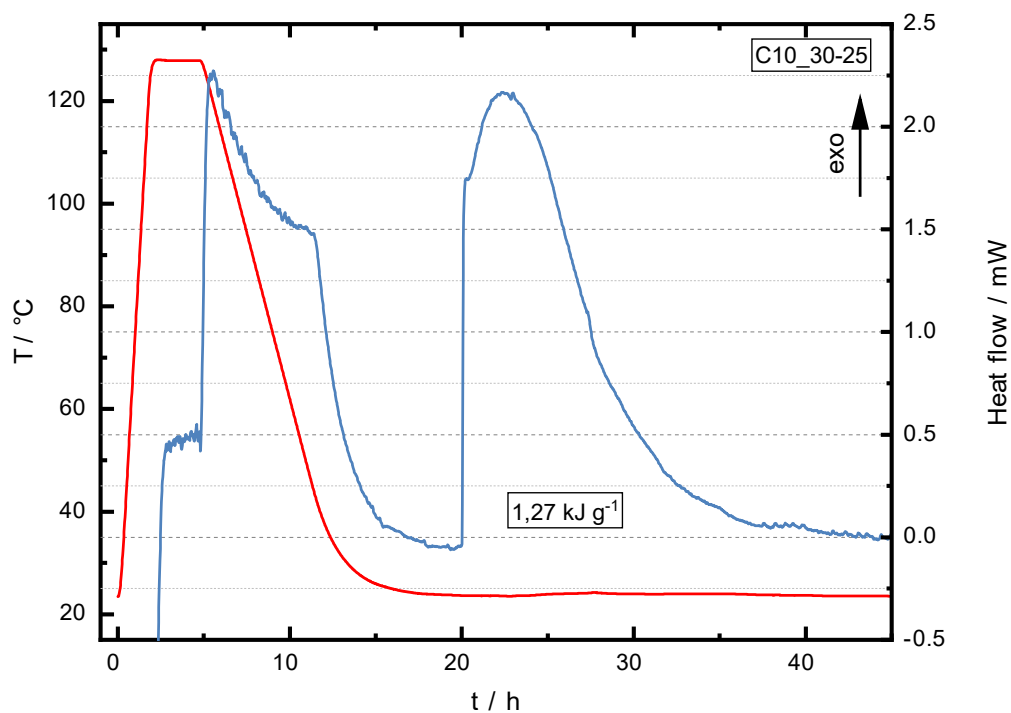

**Figure S11.** Heat of reaction measured by isothermal calorimetry at 30 % RH.

Thermogravimetric examination of the calorimetric sample

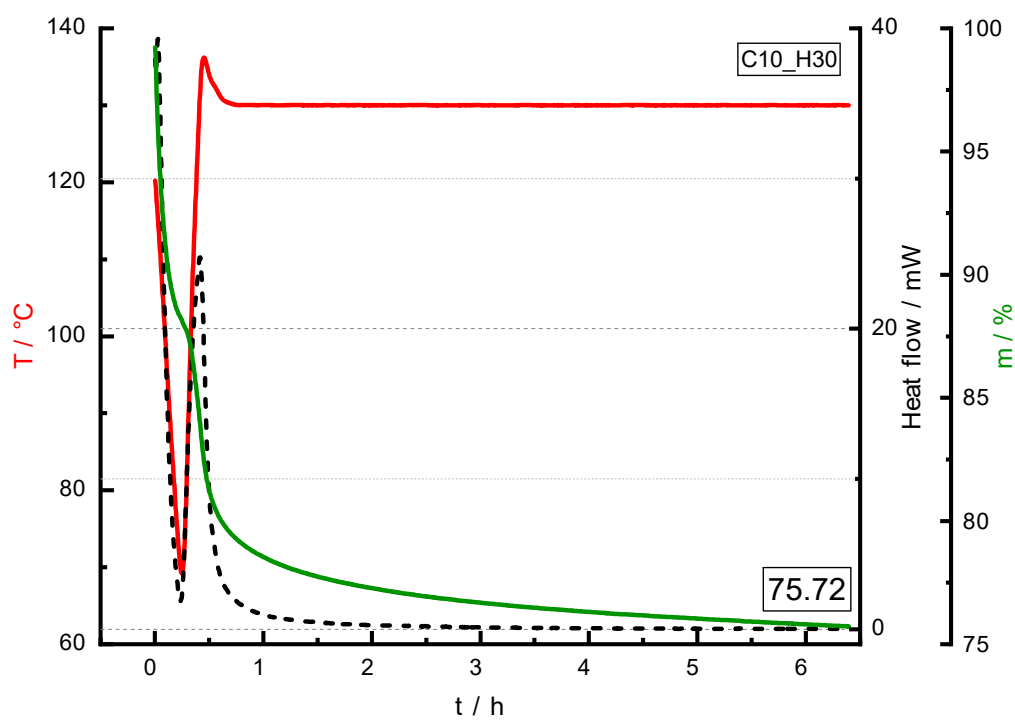

**Figure S12.** Mass loss during dehydration at 130  $^\circ\text{C}$ .

# **Calcium chloride alginate composite – fifteen cycles – calorimetric and thermo gravimetric measurement.**

*Reaction calorimetry with 20 % relative humidity in nitrogen*

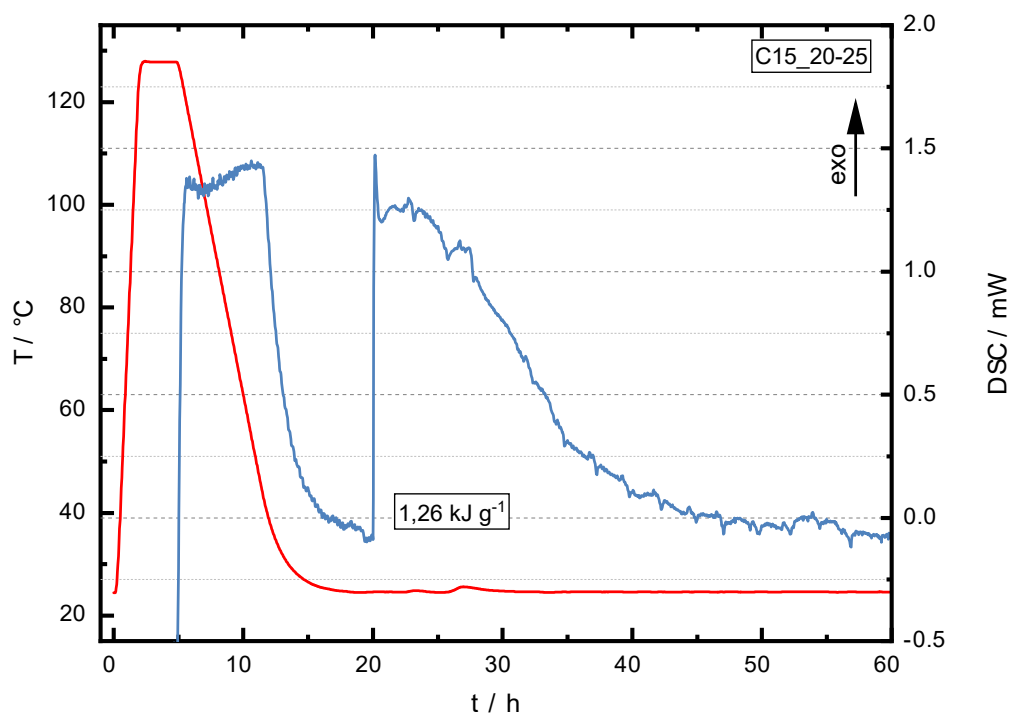

**Figure S13.** Heat of reaction measured by isothermal calorimetry at 20 % RH.

*Thermogravimetric examination of the calorimetric sample*

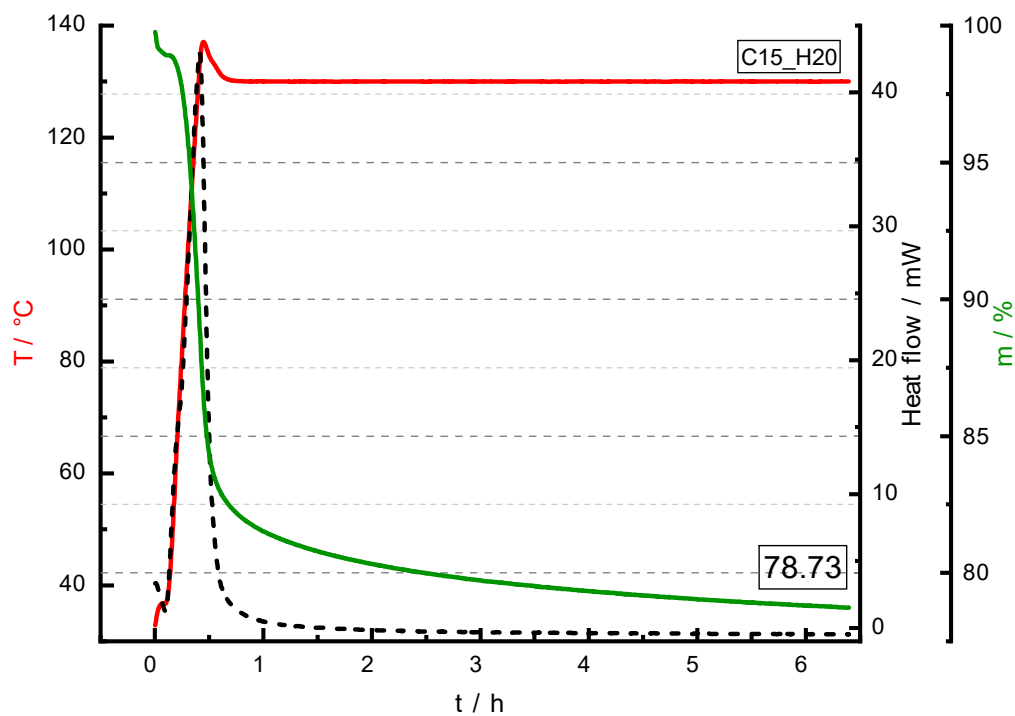

**Figure S14.** Mass loss during dehydration at 130 °C.



Reaction calorimetry with 30 % relative humidity in nitrogen

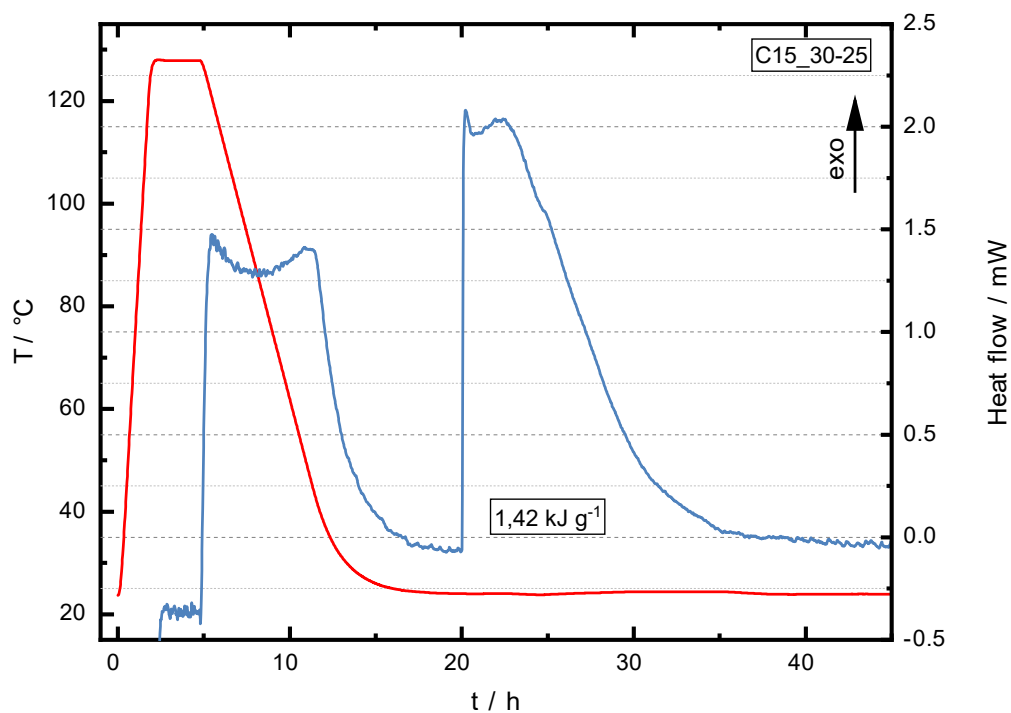

Figure S15. Heat of reaction measured by isothermal calorimetry at 30 % RH.

Thermogravimetric examination of the calorimetric sample

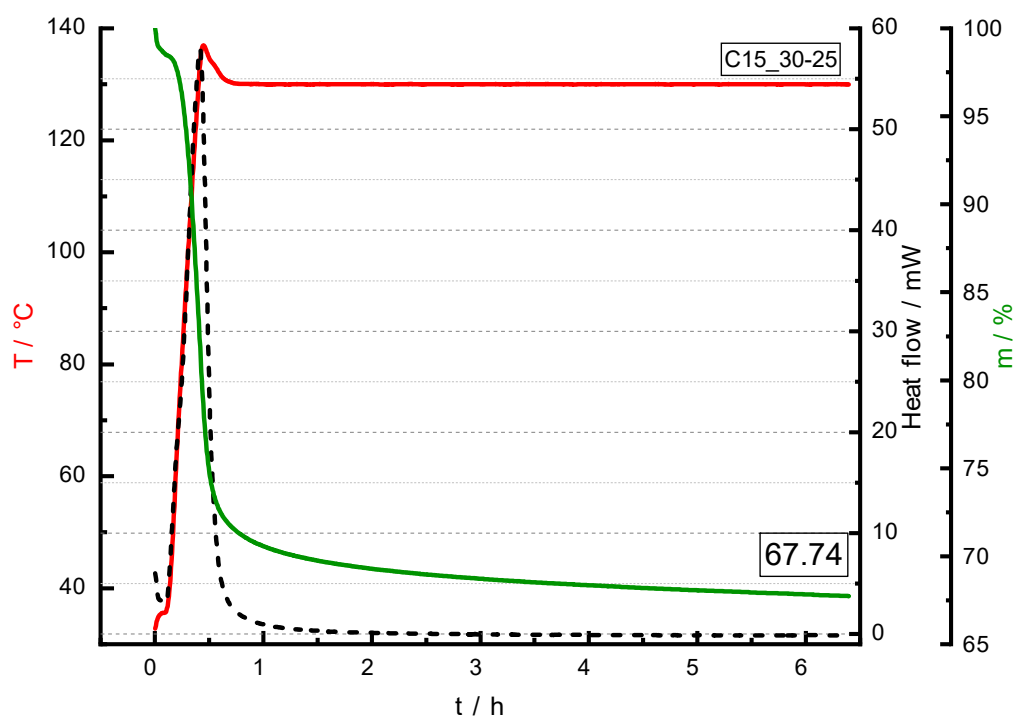

Figure S16. Mass loss during dehydration at 130 °C.
